# Supplementary material for: Intracellular Signaling in Key Pathways Is Induced by Treatment with Ultrasound and Microbubbles in a Leukemia Cell Line, but Not in Healthy Peripheral Blood Mononuclear Cells
Source: PubMed Central journal article supplement (PMC6680714; doi:10.3390/pharmaceutics11070319), 2019-07-06
Supplement: pharmaceutics-11-00319-s001.pdf [file pharmaceutics-11-00319-s001.pdf]

# Supplementary Materials: Intracellular Signaling in Key Pathways Is Induced by Treatment with Ultrasound and Microbubbles in a Leukemia Cell Line, but not in Healthy Peripheral Blood Mononuclear Cells

Ragnhild Haugse Anika Langer, Stein-Erik Gullaksen, Silje Maria Sundøy, Bjørn Tore Gjertsen, Spiros Kotopoulos and Emmet McCormack

*Volume normalisation of cell concentration*

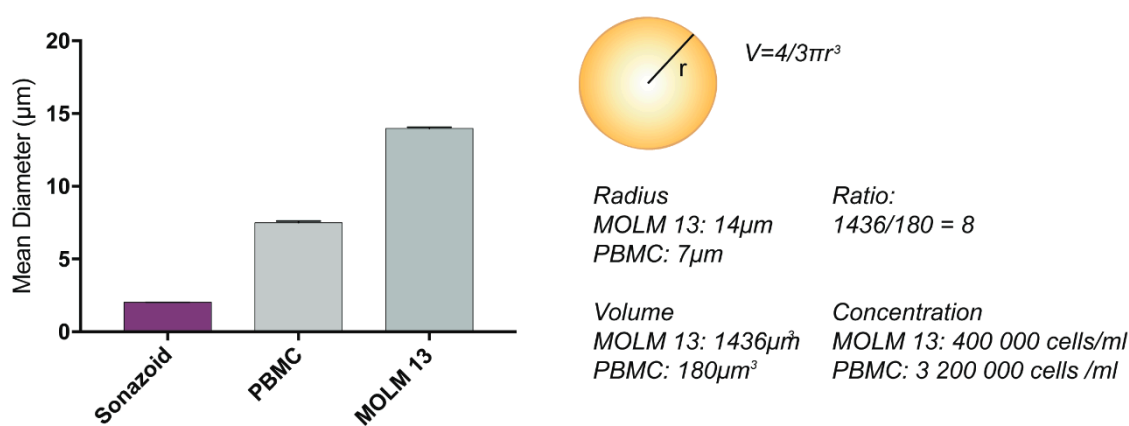

**Figure S1.** Volume normalisation of cell concentration.

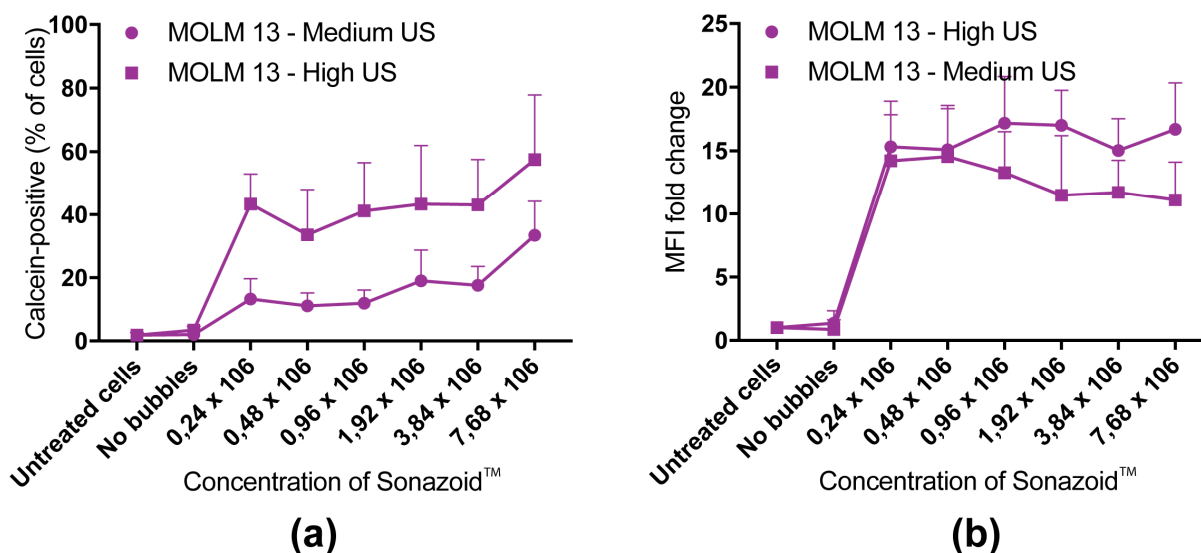

**Figure S2.** (a) Percentage calcein-positive cells by increasing concentration of Sonazoid™ (b) Calcein uptake (fold change of mean fluorescence intensity) of cells by increasing concentration of Sonazoid™.

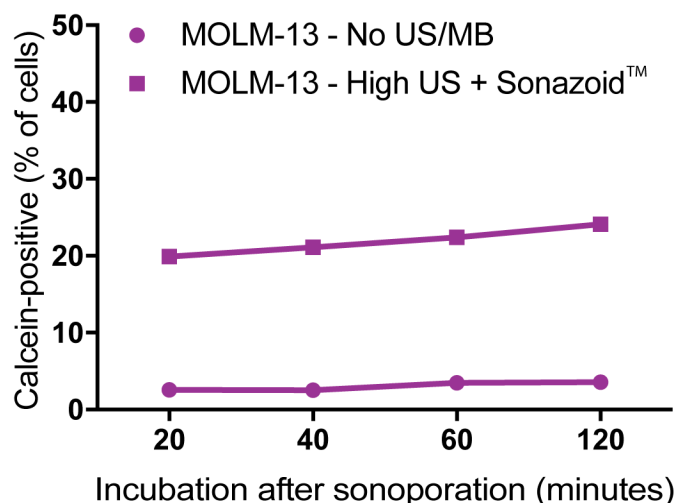

**Figure S3.** Optimisation of incubation time post treatment ( $n = 1$ ). Increasing the incubation time results in minor increases in the number of calcein positive cells.

### Sample preparation for phospho-flow cytometry

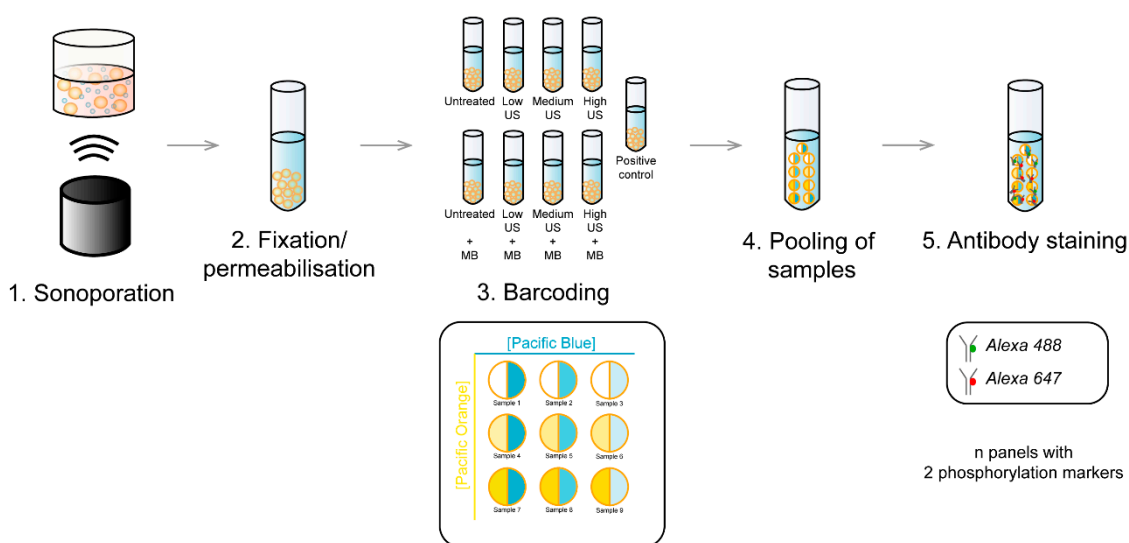

**Figure S4.** Sample processing for phospho-flow cytometry. After sonoporation cells were fixed and permeabilised, barcoded, stained with phosphorylation specific antibodies and analysed by flow cytometry. Barcoding of cells allows for reduced analytical variation. Samples harvested after 5 min, 30 min and 2 h after sonoporation at low medium and high ultrasound intensity were barcoded and pooled in to one sample per timepoint. All treated samples were normalized to untreated cells in the same barcode. Pooled samples were divided in tubes for antibody staining with panels consisting of 2 phosphospecific antibodies conjugated to respectively Alexa 488 and Alexa 647.

### Gating strategy

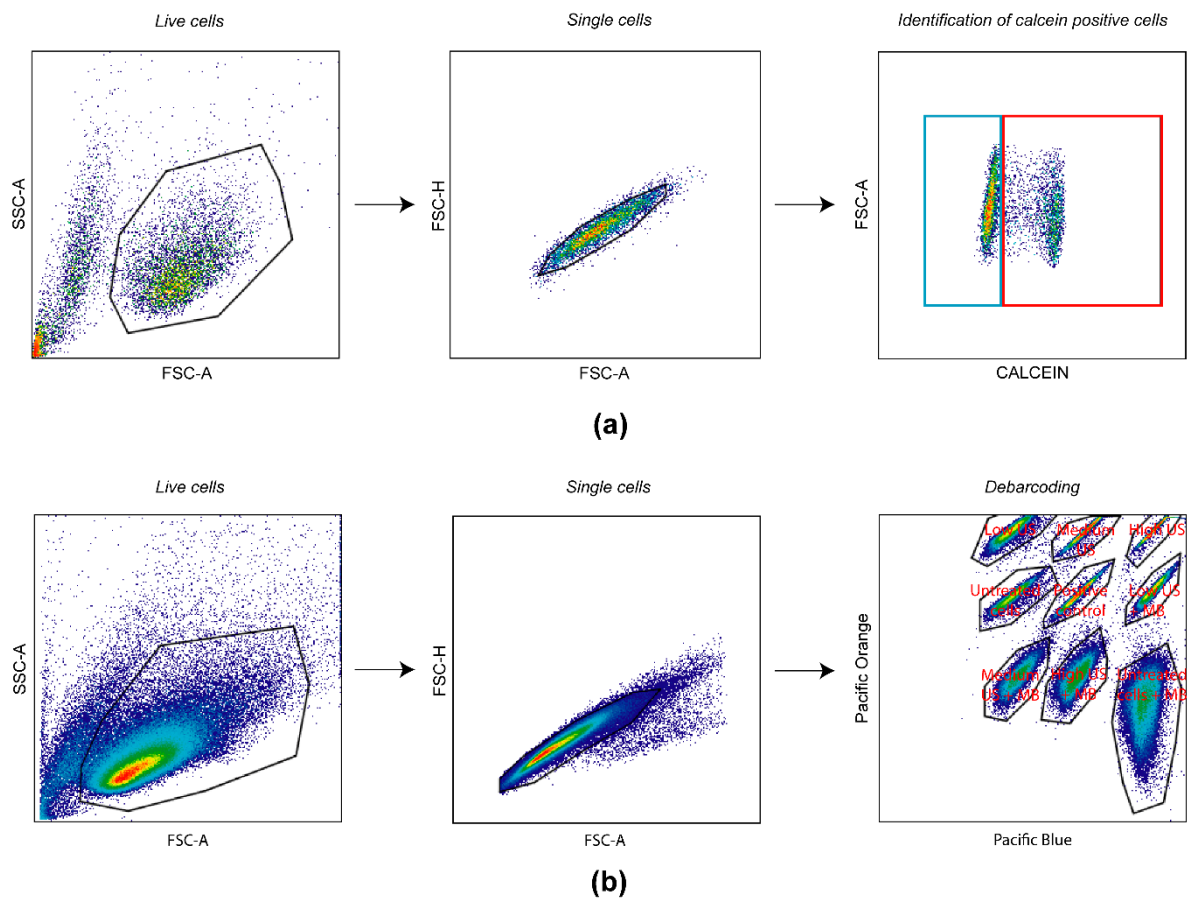

**Figure S5.** Gating strategy of flow cytometric data. After identification of the populations the median fluorescence intensity of each sample of cells treated with ultrasound  $\pm$  microbubbles was compared to the median fluorescence intensity of the untreated cells. **(a)** Gating strategy for identification of calcein-positive population. One sample were analysed per treatment condition **(b)** Gating strategy for de-barcoding for identification of each individually stained sample. One pooled sample (untreated cells, low US, medium US, high US, positive control, low US + MB, medium US + MB, high US + MB) was analysed per timepoint post sonoporation.

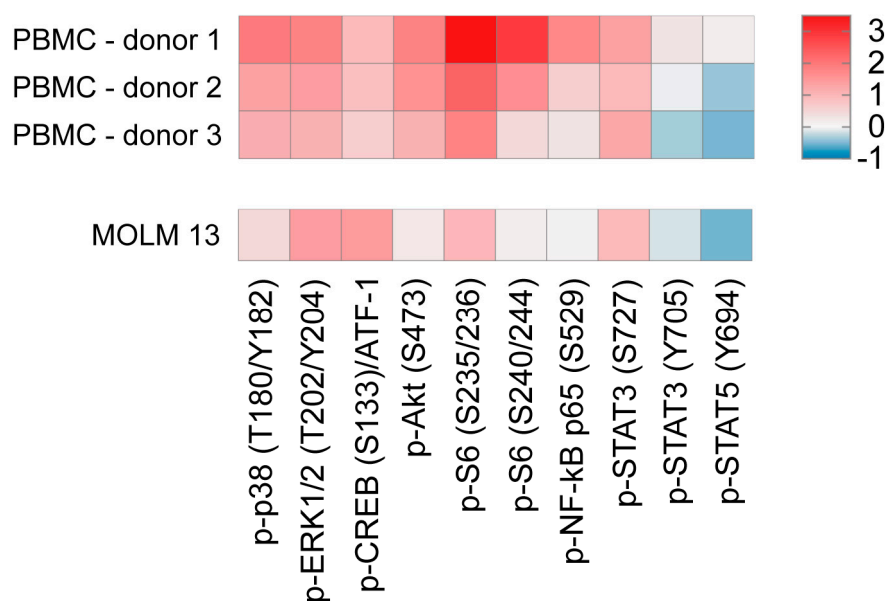

**Figure S6.** Change in phosphorylation status in response to positive controls (A23187 + PMA), represented as arcinh ratio normalised to untreated cells. Some variation in response is observed between peripheral blood mononuclear cells (PBMC) from 3 different donors. PBMCs exhibit a stronger response to this stimuli compared to cell line MOLM-13.

**Table S1.** Phospho-proteins investigated using flow cytometry.

| Target            | Epitope        | Fluorochrome | Manufacturer   |
|-------------------|----------------|--------------|----------------|
| Phospho-ERK1/2    | Thr 202/Tyr204 | Alexa 488    | BD BioSciences |
| Phospho-p38       | Thr 180/Tyr182 | Alexa 488    | BD BioSciences |
| Phospho-CREB      | Ser 133/ATF-1  | Alexa 488    | BD BioSciences |
| Phospho-Akt       | Ser 473        | Alexa 647    | BD BioSciences |
| Phospho-S6        | Ser 235/236    | Alexa 647    | BD BioSciences |
| Phospho-S6        | Ser 240/244    | Alexa 488    | BD BioSciences |
| Phospho-NF-kB p65 | Ser 529        | Alexa 647    | BD BioSciences |
| Phospho-STAT3     | Ser 727        | Alexa 647    | BD BioSciences |
| Phospho-STAT3     | Tyr 705        | Alexa 488    | BD BioSciences |
| Phospho-STAT5     | Tyr 694        | Alexa 647    | BD BioSciences |
| Phospho-FAK       | Ser 910        | Alexa 488    | BD BioSciences |
| Phospho-Src       | Tyr 418        | Alexa 488    | BD BioSciences |
| Phospho-PDPK1     | Ser 241        | Alexa 488    | BD BioSciences |
| Ack-53            | Ack 382        | Alexa 647    | BD BioSciences |
| Phospho-53        | Ser 37         | Alexa 647    | BD BioSciences |

**Table S2.** The effect of increasing ultrasound intensity on uptake of calcein and viability (Ultrasound treatment vs untreated sample).

|                                |           | <u>MOLM-13</u> |         |           |         | <u>PBMC</u> |        |           |         |
|--------------------------------|-----------|----------------|---------|-----------|---------|-------------|--------|-----------|---------|
|                                |           | No US          | Low US  | Medium US | High US | No US       | Low US | Medium US | High US |
| <b>Calcein positive cells</b>  | No MB     | ---            | ns      | ns        | >0.001  | ---         | ns     | ns        | ns      |
|                                | Sonazoid™ | ns             | ns      | >0.0001   | >0.0001 | ns          | ns     | =0.05     | >0.0001 |
|                                | SonoVue®  | ns             | ns      | >0.0001   | >0.0001 |             |        |           |         |
| <b>Calcein MFI fold change</b> | No MB     | ---            | ns      | ns        | >0.001  | ---         | ns     | ns        | >0.05   |
|                                | Sonazoid™ | >0.001         | >0.0001 | >0.0001   | >0.0001 | ns          | ns     | >0.01     | >0.0001 |
|                                | SonoVue®  | ns             | >0.05   | >0.0001   | >0.0001 |             |        |           |         |
| <b>Cell count</b>              | No MB     | ---            | ns      | ns        | ns      | ---         | ns     | ns        | ns      |
|                                | Sonazoid™ | ---            | ns      | >0.001    | >0.01   | ---         | >0.05* | >0.01*    | ns      |
| <b>Hoechst</b>                 | No MB     | ---            | >0.01*  | >0.01*    | ns      | ---         | ns     | ns        | ns      |
|                                | Sonazoid™ | ---            | ns      | >0.001    | >0.0001 | ---         | ns     | ns        | ns      |
| <b>Colony forming assay</b>    | No MB     | ---            | ns      | ns        | ns      |             |        |           |         |
|                                | Sonazoid™ | ---            | >0.05   | >0.05     | >0.001  |             |        |           |         |

\* The differences in the measured values are very small and not considered relevant

**Table S3.** The effect of adding microbubbles on uptake of calcein and viability (Treatment without microbubbles vs treatment with microbubbles).

|                                |           | <u>MOLM-13</u>   |                 | <u>PBMC</u>      |                 |
|--------------------------------|-----------|------------------|-----------------|------------------|-----------------|
|                                |           | <u>Sonazoid™</u> | <u>SonoVue®</u> | <u>Sonazoid™</u> | <u>SonoVue®</u> |
| <b>Calcein positive cells</b>  | No US     | ns               | ns              | ns               | Not tested      |
|                                | Low US    | ns               | ns              | ns               | Not tested      |
|                                | Medium US | >0.0001          | >0.0001         | >0.01            | Not tested      |
|                                | High US   | >0.0001          | >0.0001         | >0.0001          | Not tested      |
| <b>Calcein MFI fold change</b> | No US     | >0.001*          | ns              | ns               | Not tested      |
|                                | Low US    | >0.0001          | ns              | ns               | Not tested      |
|                                | Medium US | >0.0001          | >0.0001         | >0.05            | Not tested      |
|                                | High US   | >0.0001          | >0.0001         | >0.0001          | Not tested      |
|                                |           | 0 h              | 24 h            | 0 h              | 24 h            |
| <b>Cell count</b>              | No US     | ---              | ---             | ---              | ---             |
|                                | Low US    | ns               | ns              | ns               | >0.05*          |
|                                | Medium US | ns               | >0.001          | ns               | >0.001*         |
|                                | High US   | ns               | >0.001          | ns               | ns              |
| <b>Hoechst</b>                 | No US     |                  | ns              |                  | ns              |
|                                | Low US    |                  | ns              |                  | ns              |
|                                | Medium US |                  | >0.0001         |                  | ns              |
|                                | High US   |                  | >0.0001         |                  | ns              |
|                                |           | 7–10 days        |                 |                  |                 |
| <b>Colony forming assay</b>    | No US     | ns               |                 |                  |                 |
|                                | Low US    | ns               |                 |                  |                 |
|                                | Medium US | >0.01            |                 |                  |                 |
|                                | High US   | >0.001           |                 |                  |                 |

\* The differences in the measured values are very small and not considered relevant

**Table S4.** The effect of using different bubbles on calcein uptake (SonoVue® vs Sonazoid™).

|                         |         | <u>MOLM-13</u> |        |           |         |
|-------------------------|---------|----------------|--------|-----------|---------|
|                         |         | No US          | Low US | Medium US | High US |
| Calcein positive cells  | MOLM-13 | ns             | ns     | >0.0001   | >0.05   |
| Calcein MFI fold change | MOLM-13 | ns             | >0.05  | >0.01     | >0.0001 |

**Table S5.** The different response in different cell types on calcein uptake (MOLM-13 vs PBMCs).

|                         |           | No US   | Low US  | Medium US | High US |
|-------------------------|-----------|---------|---------|-----------|---------|
| Calcein positive cells  | Sonazoid™ | >0.0001 | >0.0001 | >0.001    | >0.0001 |
| Calcein MFI fold change | Sonazoid™ | ns      | >0.001  | >0.0001   | >0.0001 |



|               |           |        | <u>MOLM-13</u> |        |           |         | <u>PBMC</u> |         |           |         |
|---------------|-----------|--------|----------------|--------|-----------|---------|-------------|---------|-----------|---------|
|               |           |        | No US          | Low US | Medium US | High US | No US       | Low US  | Medium US | High US |
| p-Akt S473    | No MB     | 5 min  | ---            | ns     | ns        | ns      | ---         | ns      | ns        | ns      |
|               |           | 30 min | ---            | ns     | ns        | ns      | ns          | ns      | ns        | ns      |
|               |           | 2 h    | ---            | >0.05* | ns        | ns      | ns          | ns      | ns        | ns      |
|               | Sonazoid™ | 5 min  | ns             | ns     | > 0.01    | >0.01   | ns          | ns      | ns        | ns      |
|               |           | 30 min | >0.01*         | ns     | ns        | >0.05*  | ns          | >0.05*  | ns        | ns      |
|               |           | 2 h    | ns             | ns     | ns        | >0.01*  | ns          | ns      | ns        | ns      |
| p-S6 S235/236 | No MB     | 5 min  | ---            | ns     | ns        | ns      | ---         | ns      | ns        | ns      |
|               |           | 30 min | ---            | ns     | ns        | ns      | ns          | ns      | ns        | ns      |
|               |           | 2 h    | ---            | ns     | ns        | ns      | ns          | ns      | ns        | ns      |
|               | Sonazoid™ | 5 min  | ns             | ns     | ns        | ns      | ns          | ns      | ns        | ns      |
|               |           | 30 min | ns             | ns     | ns        | ns      | ns          | >0.05*  | >0.01*    | ns      |
|               |           | 2 h    | ns             | ns     | ns        | ns      | ns          | ns      | ns        | ns      |
| p-S6 S240     | No MB     | 5 min  | ---            | ns     | ns        | ns      | ---         | ns      | ns        | ns      |
|               |           | 30 min | ---            | ns     | ns        | ns      | ns          | ns      | ns        | ns      |
|               |           | 2 h    | ---            | ns     | ns        | ns      | ns          | ns      | >0.05*    | ns      |
|               | Sonazoid™ | 5 min  | ns             | ns     | ns        | ns      | ns          | ns      | >0.0001*  | ns      |
|               |           | 30 min | ns             | ns     | ns        | ns      | ns          | ns      | ns        | ns      |
|               |           | 2 h    | ns             | ns     | ns        | ns      | ns          | >0.001* | ns        | ns      |
|               | No MB     | 5 min  | ---            | ns     | ns        | ns      | ---         | ns      | ns        | ns      |



|                     |           |        | <u>MOLM-13</u> |        |           |         | <u>PBMC</u> |        |           |         |
|---------------------|-----------|--------|----------------|--------|-----------|---------|-------------|--------|-----------|---------|
|                     |           |        | No US          | Low US | Medium US | High US | No US       | Low US | Medium US | High US |
| p-NF-kB p65<br>S529 | Sonazoid™ | 30 min | ---            | ns     | ns        | ns      | ns          | ns     | ns        | ns      |
|                     |           | 2 h    | ---            | ns     | ns        | ns      | ns          | ns     | ns        | ns      |
|                     |           | 5 min  | ns             | ns     | ns        | >0.01*  | ns          | ns     | ns        | ns      |
|                     |           | 30 min | ns             |        | >0.01*    | ns      | ns          | ns     | ns        | ns      |
|                     |           | 2 h    | ns             | ns     | ns        | ns      | ns          | ns     | ns        | ns      |
| p-STAT3 S727        | No MB     | 5 min  | ---            | ns     | ns        | ns      | ---         | ns     | ns        | ns      |
|                     |           | 30 min | ---            | ns     | ns        | ns      | ns          | ns     | ns        | ns      |
|                     |           | 2 h    | ---            | ns     | ns        | ns      | ns          | ns     | ns        | ns      |
|                     | Sonazoid™ | 5 min  | ns             | ns     | >0.0001   | >0.0001 | ns          | ns     | ns        | ns      |
|                     |           | 30 min | ns             | ns     | >0.05*    | ns      | ns          | ns     | ns        | >0.01*  |
|                     |           | 2 h    | ns             | ns     | >0.05*    | ns      | ns          | ns     | ns        | ns      |
| p-STAT3 Y705        | No MB     | 5 min  | ---            | >0.01* | >0.01*    | ns      | ---         | ns     | ns        | ns      |
|                     |           | 30 min | ---            | ns     | ns        | ns      | ns          | ns     | ns        | ns      |
|                     |           | 2 h    | ---            | ns     | ns        | ns      | ns          | ns     | ns        | ns      |
|                     | Sonazoid™ | 5 min  |                | >0.01* | ns        | ns      | ns          | ns     | ns        | ns      |
|                     |           | 30 min |                | >0.01* | ns        | ns      | >0.01*      | ns     | ns        | ns      |
|                     |           | 2 h    |                | ns     | ns        | ns      | ns          | ns     | ns        | ns      |
| p-STAT5 Y694        | No MB     | 5 min  | ---            | **     | **        | **      | ---         | ns     | ns        | ns      |
|                     |           | 30 min | ---            | **     | **        | **      | ns          | ns     | ns        | ns      |

|           |        | <u>MOLM-13</u> |        |           |         | <u>PBMC</u> |        |           |         |
|-----------|--------|----------------|--------|-----------|---------|-------------|--------|-----------|---------|
|           |        | No US          | Low US | Medium US | High US | No US       | Low US | Medium US | High US |
| Sonazoid™ | 2 h    | ---            | **     | **        | **      | ns          | ns     | ns        | ns      |
|           | 5 min  |                | **     | **        | **      | ns          | ns     | ns        | ns      |
|           | 30 min |                | **     | **        | **      | ns          | ns     | > 0.01*   | ns      |
|           | 2 h    |                | **     | **        | **      | ns          | ns     | ns        | ns      |

\* The difference in the actual measured values are very small and not considered relevant (Arcinhratio below 0.2).

\*\* STAT5 was unchanged, and only analyzed once for MOLM-13. Statistical significance could not be tested.

Phosphorylation of FAK, Src, PDPK-1 and p53 was unchanged. These were analyzed once for MOLM-13, and not at all for PBMCs. Statistical significance could not be tested.

**Table S7.** The effect of increasing ultrasound intensity protein phosphorylation (Ultrasound treatment X vs Ultrasound treatment Y).

|                       |           | <u>MOLM-13</u> |                            |                             |
|-----------------------|-----------|----------------|----------------------------|-----------------------------|
|                       |           |                | Low US <i>vs</i> Medium US | Medium US <i>vs</i> High US |
| p-p38<br>(T180/Y182)  | No MB     | 5 min          | ns                         | ns                          |
|                       |           | 30 min         | ns                         | ns                          |
|                       |           | 2 h            | ns                         | ns                          |
|                       | Sonazoid™ | 5 min          | >0.01                      | ns                          |
|                       |           | 30 min         | ns                         | ns                          |
|                       |           | 2 h            | ns                         | ns                          |
|                       |           | <hr/>          |                            |                             |
| p-ERK1/2<br>T202/Y204 | No MB     | 5 min          | ns                         | ns                          |
|                       |           | 30 min         | ns                         | ns                          |
|                       |           | 2 h            | ns                         | ns                          |
|                       | Sonazoid™ | 5 min          | >0.0001                    | ns                          |
|                       |           | 30 min         | ns                         | ns                          |
|                       |           | 2 h            | ns                         | ns                          |
|                       |           | <hr/>          |                            |                             |
| p-CREB<br>S133/ATF-1  | No MB     | 5 min          | ns                         | ns                          |
|                       |           | 30 min         | ns                         | ns                          |
|                       |           | 2 h            | ns                         | ns                          |
|                       | Sonazoid™ | 5 min          | >0.01                      | ns                          |
|                       |           | 30 min         | ns                         | ns                          |
|                       |           | 2 h            | ns                         | ns                          |
|                       |           | <hr/>          |                            |                             |
| p-Akt S473            | No MB     | 5 min          | ns                         | ns                          |
|                       |           | 30 min         | ns                         | ns                          |
|                       |           | 2 h            | ns                         | ns                          |
|                       | Sonazoid™ | 5 min          | >0.05                      | ns                          |
|                       |           | 30 min         | ns                         | ns                          |
|                       |           | 2 h            | ns                         | ns                          |
|                       |           | <hr/>          |                            |                             |
| p-S6 S235/236         | No MB     | 5 min          | ns                         | ns                          |
|                       |           | 30 min         | ns                         | ns                          |
|                       |           | 2 h            | ns                         | ns                          |
|                       | Sonazoid™ | 5 min          | ns                         | ns                          |
|                       |           | 30 min         | ns                         | ns                          |
|                       |           | 2 h            | ns                         | ns                          |
|                       |           | <hr/>          |                            |                             |
| p-STAT3 S727          | No MB     | 5 min          | ns                         | ns                          |
|                       |           | 30 min         | ns                         | ns                          |
|                       |           | 2 h            | ns                         | ns                          |
|                       | Sonazoid™ | 5 min          | >0.001                     | ns                          |
|                       |           | 30 min         | ns                         | ns                          |
|                       |           | 2 h            | ns                         | ns                          |
|                       |           | <hr/>          |                            |                             |
